# Supplementary material for: Production of pure potassium salts directly from sea bittern employing tartaric acid as a benign and recyclable K+ precipitant
Source: Royal Society of Chemistry journal article supplement (doi:10.1039/c4ra04360j), 2014-01-01
Supplement: c4ra04360j1.pdf [file c4ra04360j1.pdf]

Electronic Supplementary Material (ESI) for RSC Advances.  
This journal is © The Royal Society of Chemistry 2014

## Supporting Information

### **Production of pure potassium salts directly from sea bittern employing tartaric acid as a benign and recyclable K<sup>+</sup> precipitant**

Krishna Kanta Ghara,<sup>a</sup> Nikunja Korat,<sup>b</sup> Dixita Bhalodia,<sup>b</sup> Jignesh Solanki,<sup>b</sup> Pratyush Maiti<sup>b,\*</sup> and Pushpito K. Ghosh<sup>a,b\*</sup>

<sup>a</sup>AcSIR-Central Salt & Marine Chemicals Research Institute, G. B Marg, Bhavnagar-364002, (Gujarat), India; <sup>b</sup>CSIR-Central Salt & Marine Chemicals Research Institute, G. B Marg, Bhavnagar, 364002, Gujarat, India

| <b>Section No.</b> | <b>List of Contents</b>                            | <b>Page</b> |
|--------------------|----------------------------------------------------|-------------|
| S1.                | Figures S1 to S8                                   | 2 - 9       |
| S2.                | Tables S1 to S4                                    | 10-15       |
| S3.                | Computation of pH of bittern with added bitartrate | 16          |
| S4.                | References                                         | 17          |

Section S1. (Figures S1 to S8)

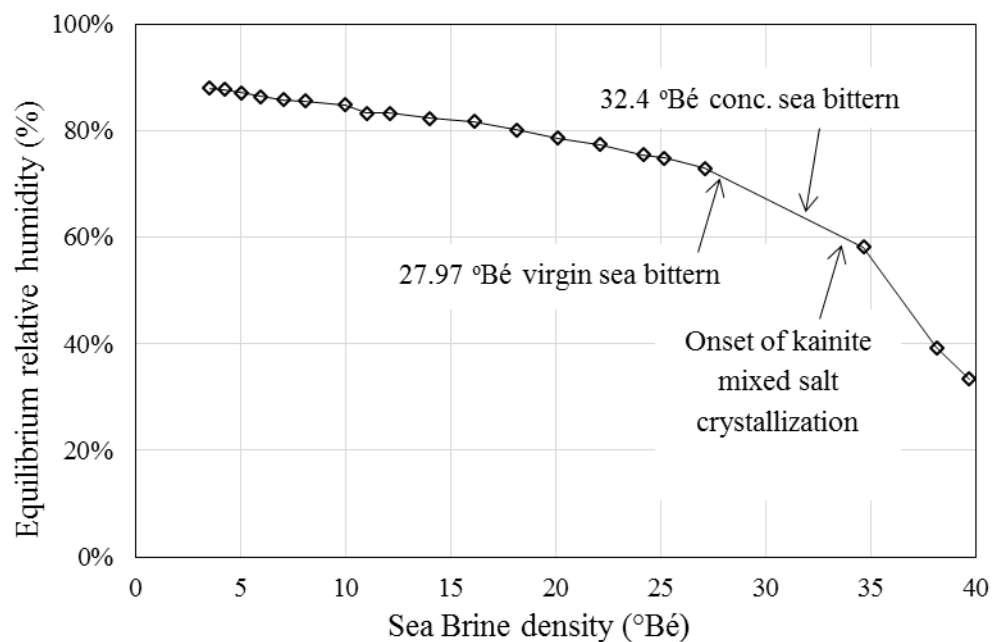

**Figure S1.** Plot of equilibrium relative humidity (ERH) vs. Baumé density of sea brine based on literature data [ $^{\circ}\text{Bé} = 145(1-1/\rho)$ , where  $\rho$  its specific gravity and  $^{\circ}\text{Bé}$  is the density in Baumé scale].<sup>1-3</sup> The onset of kainite mixed salt crystallization, essential for recovery through conventional process is indicated. The points are also marked for the virgin and concentrated bittern samples used in the present study.

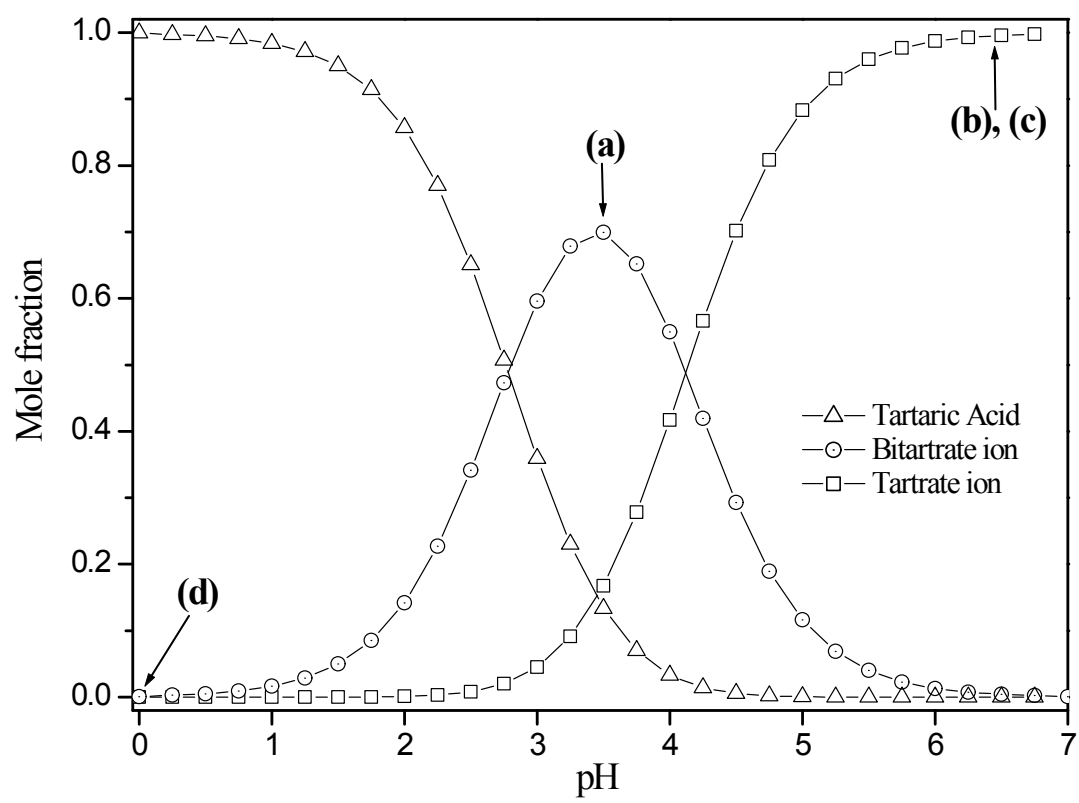

**Figure S2.** Plot of tartaric acid species distribution as function of pH based on literature data.<sup>4</sup> Favourable regions for (a) MgT to KHT conversion (b) KHT to MgT conversion, (c) residual tartrate removal as CaT and (d) CaT to H<sub>2</sub>T conversion are indicated.

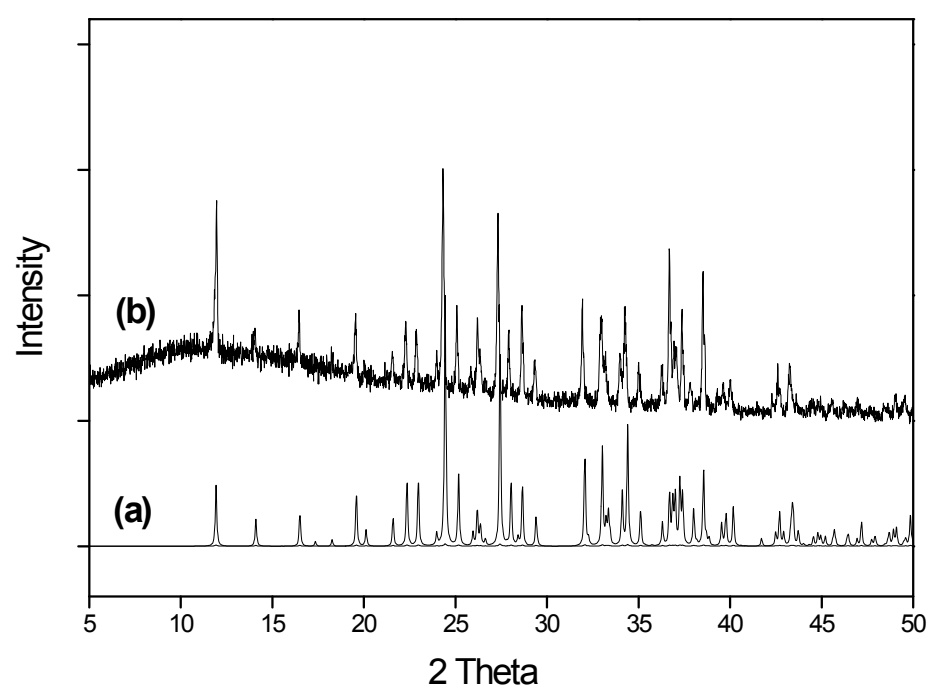

**Figure S3.** Powder XRD of (a) simulated pattern generated from the single crystal XRD data of DL- KHT (CCDC 236651) and (b) precipitate obtained at pH 3.5 from the experiment of Figure 1A.

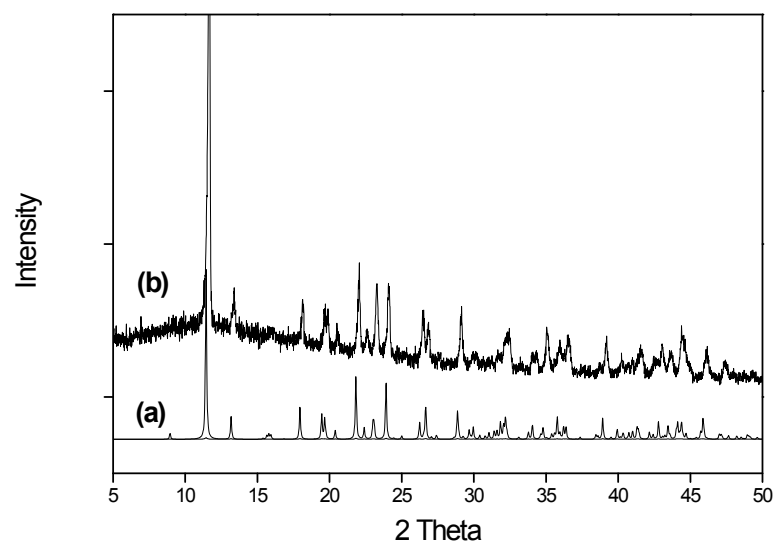

**Figure S4.** Powder XRD of (a) simulated pattern generated from the single crystal XRD data of DL-calcium tartrate (CCDC 738956)<sup>5</sup> and (b) precipitate obtained in the experiment of Figure 1B.

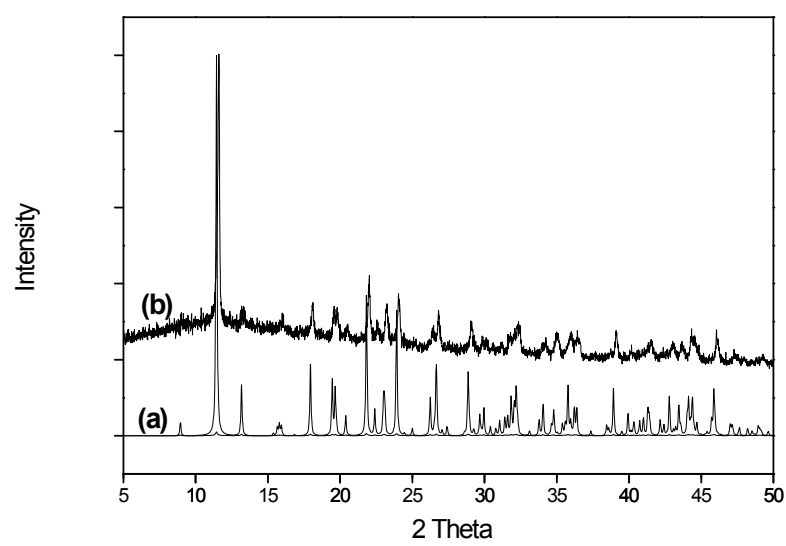

**Figure S5.** Powder XRD of (a) simulated pattern generated from the single crystal XRD data of DL-calcium tartrate (CCDC 738956)<sup>5</sup> and (b) precipitate obtained in the experiment of Figure 2A.

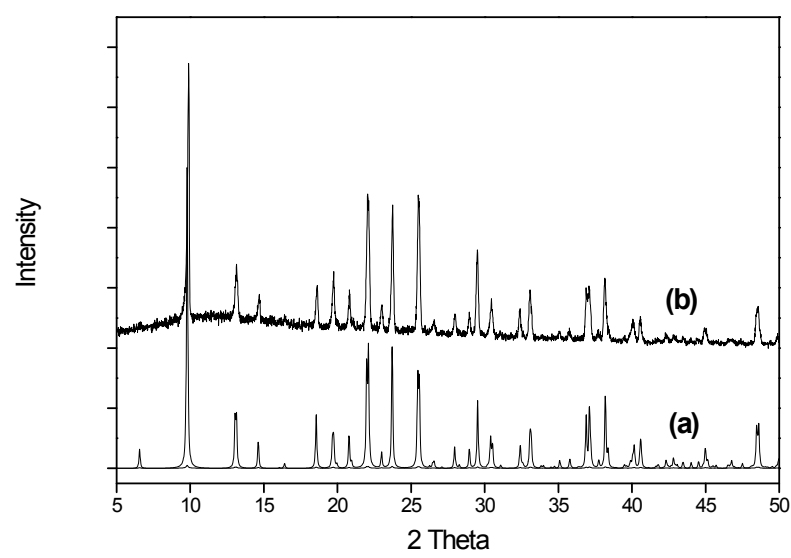

**Figure S6.** Powder XRD of (a) simulated pattern generated from the single crystal XRD data of DL-magnesium tartrate (CCDC 631939) and (b) precipitate obtained in the experiment of Figure 2B.

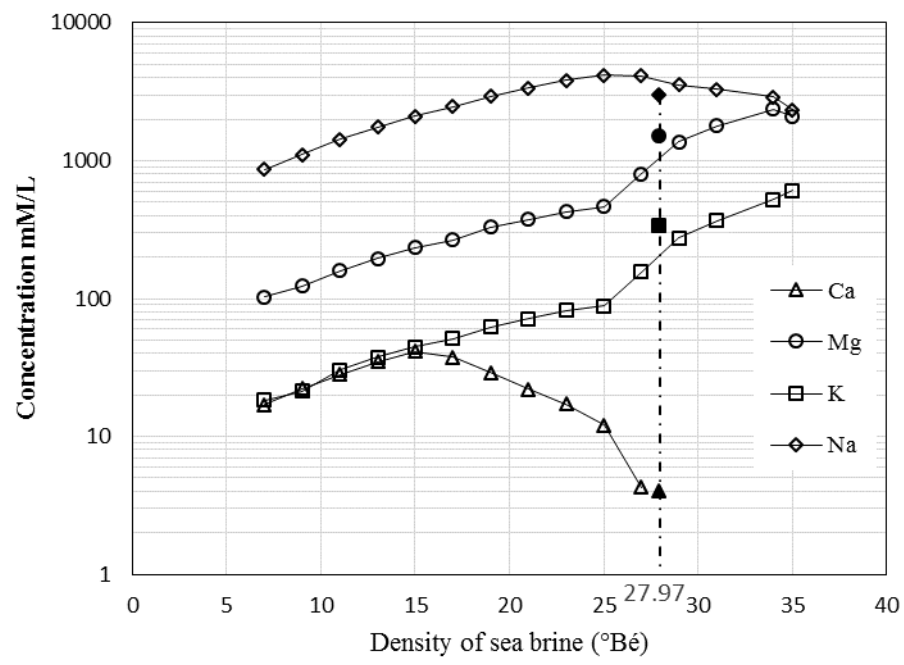

**Figure S7.** Concentration profiles of major cations in sea brine as a function of Baumé density.<sup>6</sup> The concentrations of cations in the virgin sea bitter (27.97 °Bé) employed in the present study are superimposed in the plot as the corresponding filled shapes.



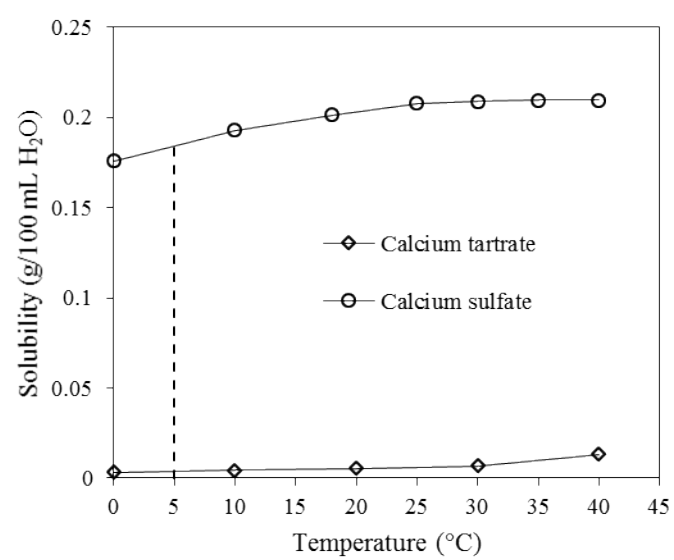

**Figure S8.** Solubility versus Temperature curves of gypsum and calcium tartrate based on literature data on their solubility characteristics in water.<sup>7</sup> 5 °C corresponds to the temperature adopted in the present study for recovery of residual tartaric acid in K<sup>+</sup> depleted bittern through the conversion of CaSO<sub>4</sub> to CaT.

**Section S2.**

**Table S1.** Composition of bitters.

| <i>Parameter</i>                                        | <i>27.97 °Bé<br/>Virgin Bittern<sup>a</sup></i> | <i>32.42 °Bé<br/>Concentrated<br/>Bittern<sup>b</sup></i> | <i>MgSO<sub>4</sub>-<br/>depleted<br/>Concentrated<br/>Bittern<sup>c</sup></i> |
|---------------------------------------------------------|-------------------------------------------------|-----------------------------------------------------------|--------------------------------------------------------------------------------|
| Specific gravity                                        | 1.239                                           | 1.288                                                     | 1.235                                                                          |
| pH                                                      | 6.8                                             | 5.4                                                       | 6.2                                                                            |
| Sodium, as Na <sup>+</sup> (% w/v)/ (M)                 | 6.83/ (2.969)                                   | 2.60/ (1.13)                                              | 2.65/ (1.152)                                                                  |
| Potassium, as K <sup>+</sup> (% w/v)/ (M)               | 1.31/ (0.336)                                   | 2.47/ (0.633)                                             | 2.47/ (0.633)                                                                  |
| Magnesium, as Mg <sup>2+</sup> (% w/v)/ (M)             | 3.63/ (1.494)                                   | 7.50/ (3.086)                                             | 6.7/ (2.757)                                                                   |
| Calcium, as Ca <sup>2+</sup> (% w/v)/ (M)               | 0.016/ (0.004)                                  | BDL <sup>d</sup>                                          | BDL <sup>d</sup>                                                               |
| Chloride, as Cl (% w/v)/ (M)                            | 27.48/ (7.741)                                  | 20.38/ (5.74)                                             | 19.3/ (5.437)                                                                  |
| Sulphate, as SO <sub>4</sub> <sup>2-</sup> (% w/v)/ (M) | 4.51/ (0.469)                                   | 9.00/ (0.9375)                                            | 4.85/ (0.505)                                                                  |

<sup>a</sup>As obtained from M/s Tata Chemicals, Mithapur, India; <sup>b</sup> After further concentration of the same bittern; <sup>c</sup>After dilution of the concentrated bittern with 10% (v/v) H<sub>2</sub>O followed by chilling to separate out Epsom salt; <sup>d</sup>BDL=below detection limit.

**Table S2.** Comparative data of energy input in the present process and energy input for equivalent products from reference database.

| Energy Input for Production based on Developed Process (GJ) <sup>a</sup> |              | Energy Input from database (GJ) <sup>a,b</sup>              |              |
|--------------------------------------------------------------------------|--------------|-------------------------------------------------------------|--------------|
| Raw Material <sup>b</sup>                                                |              | N from KNO <sub>3</sub>                                     | 12.47        |
| HNO <sub>3</sub>                                                         | 9.86         | K <sub>2</sub> O from KNO <sub>3</sub>                      | 7.26         |
| NH <sub>3</sub>                                                          | 12.52        | N from (NH <sub>4</sub> ) <sub>2</sub> SO <sub>4</sub>      | 14.13        |
| H <sub>2</sub> SO <sub>4</sub>                                           | 1.29         | MgSO <sub>4</sub> from MgSO <sub>4</sub> ·7H <sub>2</sub> O | 0.94         |
| Process Energy <sup>c</sup>                                              |              | <b>Total</b>                                                | <b>34.80</b> |
| Electrical                                                               | 3.13         |                                                             |              |
| Thermal                                                                  | 11.51        |                                                             |              |
| <b>Total</b>                                                             | <b>38.31</b> |                                                             |              |

<sup>a</sup>Basis: 1 t KNO<sub>3</sub> + 1.47 t (NH<sub>4</sub>)<sub>2</sub>SO<sub>4</sub> + 0.3 t MgSO<sub>4</sub>·7H<sub>2</sub>O; <sup>b</sup>Calculations based on Ecoinvent database, v 2.2 and GaBi database (see Table S3); <sup>c</sup>Figures based on 1 t day<sup>-1</sup> KNO<sub>3</sub> production (see detailed calculations in Table S4).

**Table S3.** Illustration of computations using Ecoinvent database, v 2.2 and GaBi database (PE International, Germany) operated with GaBi software, version 6

| Sl. No. | Name                                                        | Quantity (t) | Per ton energy requirement as per database (GJ/t) | Total energy input (GJ) | Reference              |                                                                                                              |
|---------|-------------------------------------------------------------|--------------|---------------------------------------------------|-------------------------|------------------------|--------------------------------------------------------------------------------------------------------------|
| 1       | HNO <sub>3</sub> (60%)                                      | 1.0560       | 9.34                                              | 9.86                    | PE:DE                  | Obtained through PE GaBi 6 Software-System and databases for Life Cycle Engineering. Stuttgart, Echterdingen |
| 2       | NH <sub>3</sub>                                             | 0.3440       | 36.40                                             | 12.52                   | PE:NL                  |                                                                                                              |
| 3       | H <sub>2</sub> SO <sub>4</sub>                              | 0.6100       | 2.12                                              | 1.29                    | RER Ecoinvent database |                                                                                                              |
| 4       | N from KNO <sub>3</sub>                                     | 0.1386       | 90.00                                             | 12.47                   | RER Ecoinvent database |                                                                                                              |
| 5       | K <sub>2</sub> O from KNO <sub>3</sub>                      | 0.4653       | 15.60                                             | 7.26                    | RER Ecoinvent database |                                                                                                              |
| 6       | N from (NH <sub>4</sub> ) <sub>2</sub> SO <sub>4</sub>      | 0.3120       | 45.30                                             | 14.13                   | RER Ecoinvent database |                                                                                                              |
| 7       | MgSO <sub>4</sub> from MgSO <sub>4</sub> .7H <sub>2</sub> O | 0.1490       | 6.28                                              | 0.94                    | RER Ecoinvent database |                                                                                                              |

**Table S4 (A).** Process electrical energy requirement

|         | Particulars                                                                                                                                              | Electrical Energy |              |                      |                            |                             |
|---------|----------------------------------------------------------------------------------------------------------------------------------------------------------|-------------------|--------------|----------------------|----------------------------|-----------------------------|
|         |                                                                                                                                                          | Connected load KW | Runtime (hr) | Energy consumed (GJ) | Energy Recovery Efficiency | Net Energy Consumption (GJ) |
| Step-1  | Magnesium sulphate recovery                                                                                                                              |                   |              |                      |                            |                             |
| 1/a     | Chilling of bittern for magnesium sulphate crystallisation (based on chiller rating of 13 TR as computed from chilling load in Step 1/a in Table S4 (B)) | 9.1               | 24           | 0.79                 | 33%                        | 0.53                        |
| 1/b     | Stirring of slurry                                                                                                                                       | 1.5               | 24           | 0.13                 | 0%                         | 0.13                        |
| 1/c     | Centrifugal separation                                                                                                                                   | 2                 | 24           | 0.17                 | 0%                         | 0.17                        |
|         | <b>Total (step-1)</b>                                                                                                                                    |                   |              |                      |                            | <b>0.83</b>                 |
| Step-2  | KHT precipitation                                                                                                                                        |                   |              |                      |                            |                             |
| 2/a     | Stirring of slurry                                                                                                                                       | 1.5               | 24           | 0.13                 | 0%                         | 0.13                        |
| 2/b     | Centrifugal separation                                                                                                                                   | 1.5               | 24           | 0.13                 | 0%                         | 0.13                        |
|         | <b>Total (step-2)</b>                                                                                                                                    |                   |              |                      |                            | <b>0.26</b>                 |
| Step-3  | KHT decomposition                                                                                                                                        |                   |              |                      |                            |                             |
| 3/a     | MgT precipitation                                                                                                                                        | 0.5               | 24           | 0.04                 | 0%                         | 0.04                        |
| 3/b     | Centrifugal separation                                                                                                                                   | 3                 | 24           | 0.26                 | 0%                         | 0.26                        |
|         | <b>Total (step-3)</b>                                                                                                                                    |                   |              |                      |                            | <b>0.3</b>                  |
| Step-4  | KNO3 crystallisation                                                                                                                                     |                   |              |                      |                            |                             |
| 4/a     | KNO3 crystallisation                                                                                                                                     | 0.5               | 24           | 0.04                 | 0%                         | 0.04                        |
| 4/b     | Centrifugal separation                                                                                                                                   | 1                 | 24           | 0.09                 | 0%                         | 0.09                        |
| 4/c     | KNO3 drying                                                                                                                                              | 1                 | 24           | 0.09                 | 0%                         | 0.09                        |
|         | <b>Total (step-4)</b>                                                                                                                                    |                   |              |                      |                            | <b>0.22</b>                 |
| Step-5  | Magnesium hydroxide and magnesium carbonate from magnesium sulphate                                                                                      |                   |              |                      |                            |                             |
| 5/a     | Reaction with ammonia                                                                                                                                    |                   |              |                      |                            |                             |
| Input-1 | Magnesium sulphate                                                                                                                                       |                   |              |                      |                            |                             |
| Input-2 | Water                                                                                                                                                    |                   |              |                      |                            |                             |
| Input-3 | Liquor ammonia (25%)                                                                                                                                     |                   |              |                      |                            |                             |
|         | Total                                                                                                                                                    | 1                 | 24           | 0.09                 | 0%                         | 0.09                        |
| 5/b     | Centrifugal separation                                                                                                                                   | 1                 | 24           | 0.09                 | 0%                         | 0.09                        |
| 5/c     | Reaction with CO2                                                                                                                                        | 1                 | 24           | 0.09                 | 0%                         | 0.09                        |
| 5/d     | Centrifugal separation                                                                                                                                   | 1                 | 24           | 0.09                 | 0%                         | 0.09                        |

|           |                                           |            |                                                 |      |    |             |
|-----------|-------------------------------------------|------------|-------------------------------------------------|------|----|-------------|
|           | <b>Total (step-5)</b>                     |            |                                                 |      |    | <b>0.36</b> |
| Step-6    | CaT precipitation                         |            |                                                 |      |    |             |
| 6/a       | Stirring of slurry                        | 2          | 24                                              | 0.17 | 0% | 0.17        |
| 6/b       | Centrifugal separation                    | 1          | 24                                              | 0.09 | 0% | 0.09        |
|           | <b>Total (step-6)</b>                     |            |                                                 |      |    | <b>0.26</b> |
| Step-7    | CaT digestion                             |            |                                                 |      |    |             |
| 7/a       | Reaction                                  |            |                                                 |      |    |             |
| Input-1   | CaT                                       |            |                                                 |      |    |             |
| Input-2   | H2SO4                                     |            |                                                 |      |    |             |
| Input-3   | Water                                     |            |                                                 |      |    |             |
|           | Total                                     | 1          | 24                                              | 0.09 | 0% | 0.09        |
| 7/b       | Centrifugal separation                    | 1          | 24                                              | 0.09 | 0% | 0.09        |
|           | <b>Total (step-7)</b>                     |            |                                                 |      |    | <b>0.18</b> |
| Step-8    | Calcium carbonate from gypsum             |            |                                                 |      |    |             |
| 8/a       | Reaction                                  |            |                                                 |      |    |             |
| Input-1   | Gypsum                                    |            |                                                 |      |    |             |
| Input-2   | Liquor ammonia (25%)                      |            |                                                 |      |    |             |
| Input-3   | CO2                                       |            |                                                 |      |    |             |
| Input-4   | Water                                     |            |                                                 |      |    |             |
|           | Total                                     | 0.5        | 24                                              | 0.04 | 0% | 0.04        |
| 8/b       | Centrifugal separation                    | 1          | 24                                              | 0.09 | 0% | 0.09        |
|           | <b>Total (step-8)</b>                     |            |                                                 |      |    | <b>0.13</b> |
| Step-9    | Ammonium Sulphate                         |            |                                                 |      |    |             |
| 9/a       | Evaporation of ammonium sulphate solution |            |                                                 |      |    |             |
| Input-1   | Liquor from MgSO4 section                 |            |                                                 |      |    |             |
| Input-2   | Liquor from CaSO4 section                 |            |                                                 |      |    |             |
|           | Total                                     | 1          | 24                                              | 0.09 | 0% | 0.09        |
| 9/b       | Centrifugal separation                    | 1          | 24                                              | 0.09 | 0% | 0.09        |
| 9/c       | (NH4)2SO4 drying                          | 1.5        | 24                                              | 0.13 | 0% | 0.13        |
|           | <b>Total (step-9)</b>                     |            |                                                 |      |    | <b>0.31</b> |
| <b>10</b> | <b>Material handling</b>                  | <b>10%</b> | <b>of process electrical energy requirement</b> |      |    | <b>0.28</b> |
|           | <b>Total energy requirement (1-10)</b>    |            |                                                 |      |    | <b>3.13</b> |

**Table S4 (B).** Process thermal energy requirement<sup>a</sup>

|           | Particulars                                                                                                                                                              | Quantity<br>(m3 / t) | Unit | Sp.<br>Gravity | Mass<br>t | Thermal Energy          |            |                       |         |                            | Energy<br>Recovery<br>Efficiency | Net Energy<br>Consumption<br>(GJ) |
|-----------|--------------------------------------------------------------------------------------------------------------------------------------------------------------------------|----------------------|------|----------------|-----------|-------------------------|------------|-----------------------|---------|----------------------------|----------------------------------|-----------------------------------|
|           |                                                                                                                                                                          |                      |      |                |           | Sp. Heat<br>(cal/gm-°C) | ΔT<br>(°C) | Latent Heat<br>cal/gm | Overage | Energy<br>required<br>(GJ) |                                  |                                   |
| Step-1    | Magnesium sulphate recovery                                                                                                                                              |                      |      |                |           |                         |            |                       |         |                            |                                  |                                   |
| 1/a       | Chilling of bittern for magnesium sulphate crystallisation (data used for computation of chiller rating and estimation of electrical energy requirement in Table S4 (A)) |                      |      |                |           |                         |            |                       |         |                            |                                  |                                   |
| Input-1   | Bittern (32.5 °Bé)                                                                                                                                                       | 21.51                | m3   | 1.288          | 27.70488  |                         |            |                       |         |                            |                                  |                                   |
| Input-2   | Water                                                                                                                                                                    | 2.151                | m3   | 1              | 2.151     |                         |            |                       |         |                            |                                  |                                   |
|           | Total                                                                                                                                                                    |                      |      |                | 29.85588  | 0.77                    | 30         |                       | 33%     |                            |                                  |                                   |
| Step-7    | CaT digestion                                                                                                                                                            |                      |      |                |           |                         |            |                       |         |                            |                                  |                                   |
| 7/a       | Reaction                                                                                                                                                                 |                      |      |                |           |                         |            |                       |         |                            |                                  |                                   |
| Input-1   | CaT                                                                                                                                                                      | 0.56                 | t    |                | 0.56      |                         |            |                       |         |                            |                                  |                                   |
| Input-2   | H2SO4                                                                                                                                                                    | 0.24                 | t    |                | 0.24      |                         |            |                       |         |                            |                                  |                                   |
| Input-3   | Water                                                                                                                                                                    | 1.62                 | m3   | 1              | 1.62      |                         |            |                       |         |                            |                                  |                                   |
|           | Total                                                                                                                                                                    |                      |      |                | 2.42      | 1                       | 55         |                       | 33%     | 0.74                       | 0%                               | 0.74                              |
| 7/b       | Centrifugal separation                                                                                                                                                   |                      |      |                |           |                         |            |                       |         |                            |                                  |                                   |
|           | <b>Total (step-7)</b>                                                                                                                                                    |                      |      |                |           |                         |            |                       |         |                            |                                  | <b>0.74</b>                       |
| Step-9    | Ammonium Sulphate                                                                                                                                                        |                      |      |                |           |                         |            |                       |         |                            |                                  |                                   |
| 9/a       | Evaporation of ammonium sulphate solution                                                                                                                                |                      |      |                |           |                         |            |                       |         |                            |                                  |                                   |
| Input-1   | Liquor from MgSO4 section                                                                                                                                                | 5.335805             | t    |                | 5.335805  | 0.8125                  | 80         | 540                   | 33%     | 13.95                      |                                  |                                   |
| Input-2   | Liquor from CaSO4 section                                                                                                                                                | 0.552558             | t    |                | 0.552558  | 0.8125                  | 80         | 540                   | 33%     | 1.44                       |                                  |                                   |
|           | Total                                                                                                                                                                    |                      |      |                | 5.888363  | 0.8125                  | 80         | 540                   | 33%     | 15.39                      | 30%                              | 10.77                             |
| 9/b       | Centrifugal separation                                                                                                                                                   |                      |      |                |           |                         |            |                       |         |                            |                                  |                                   |
| 9/c       | (NH4)2SO4 drying                                                                                                                                                         |                      |      |                |           |                         |            |                       |         |                            |                                  |                                   |
|           | <b>Total (step-9)</b>                                                                                                                                                    |                      |      |                |           |                         |            |                       |         |                            |                                  | <b>10.77</b>                      |
| <b>10</b> | <b>Material handling</b>                                                                                                                                                 |                      |      |                |           |                         |            |                       |         |                            |                                  |                                   |
|           | <b>Total energy requirement</b>                                                                                                                                          |                      |      |                |           |                         |            |                       |         |                            |                                  | <b>11.51</b>                      |

<sup>a</sup>Numbering of the steps follows the same sequence as in Table S4 (A). Only those steps are shown wherein thermal energy is required.

### Section S3. Computation of pH of bittern with added bitartrate

The ionic strength ( $I$ ) was computed based on eq S1 ( $C_i$  = molar concentration and  $Z_i$  = ionic charge) and the data for  $MgSO_4$ -depleted bittern in Table S1. The value was 10.1 M

$$I = \frac{1}{2} \sum C_i Z_i^2 \quad (\text{Eq S1})$$

The proton concentration  $[H_3O^+]$  in the bittern with added bitartrate was computed based on eq S3 and considering  $pK_{a2} = 4.37$  of tartaric acid. The value was  $4.93 \times 10^{-3}$  M

$$[H_3O^+] = \sqrt{[HT^-] \cdot K_{a2}} \quad (\text{Eq S2})$$

The Davies relationship (eq S3) was used to compute the proton activity coefficient ( $\gamma_{[H_3O^+]}$ ). The value was 14.46.

$$\log \gamma_i = -0.509 Z_i^2 \left[ \frac{\sqrt{I}}{1 + \sqrt{I}} - 0.3I \right] \quad (\text{Eq S3})$$

Eq. S4 gave the proton activity ( $a_{[H_3O^+]}$ ), the value being estimated to be 0.0713.

$$a_{[H_3O^+]} = [H_3O^+] \cdot \gamma_{[H_3O^+]} \quad (\text{Eq S4})$$

Finally,  $pH = -\log a_{[H_3O^+]} = 1.14$



## ESI References

1. B. P. Choudhari, *Indian Chem. Mfr.*, 1968, **6**, 117-119.
2. R. A. Buch, B. P. Chaudhari and M. R. Oza, *Symp. Salt, [Proc.]*, 1993, **7th**, 545-547.
3. R. H. Perry, D. W. Green and J. O. Maloney, *Perry's Chemical Engineers' Handbook*. 7<sup>th</sup> Ed. McGraw-Hill, 1 – 20.
4. J. S. Fritz and G. H. Schenk, *Quantitative Analytical Chemistry*. Allyn and Bacon, 1974.
5. L. N. Appelhans, M. Kosa, A. V. Radha, P. Simoncic, A. Navrotsky, M. Parrinello and A. K. Cheetham, *J. Am. Chem. Soc.*, 2009, **131**, 15375-15386.
6. (a) J. Usiglio, *Annalen der Chemie.*, 1849, **27**, 92-107. (b) F. W. Clarke, The data of geochemistry: *U. S. Geol. Survey Bull.* 1924, 770-841.
7. (a) E.W. Washburn, *International Critical Tables of Numerical Data, Physics, Chemistry and Technology*. 1st electronic edition, Knovelpublisher, Norwich, New York, 2003. (b) A. Seidell, *Solubilities of Inorganic and Organic Compounds*. 2nd edition, New York, D. Van Nostrand Company, 25 Park Place, 1919.
